# Supplementary material for: Treatment of dinitrodiazophenol industrial wastewater in heat-activated persulfate system
Source: Royal Society of Chemistry journal article supplement (doi:10.1039/c8ra01995a), 2018-01-01
Supplement: c8ra01995a1.pdf [file c8ra01995a1.pdf]

1

*Supporting Material*

2 ***Treatment of Dinitrodiazophenol Industrial Wastewater in***

3 ***Heat-Activated Persulfate System***

4 Le-lan Wei<sup>1</sup>, Wei-ming Chen<sup>2</sup>, Qi-bin Li<sup>2</sup>, Zhe-pei Gu<sup>1</sup>, Ai-ping Zhang<sup>1\*</sup>

5 1 Key Laboratory of Special Wastewater Treatment of Collages of Sichuan Province, college of

6 Chemistry and Material Science of Sichuan Normal University, Chengdu 610068, China

7 2 Geosciences and Environmental Engineering of Southwest Jiaotong University, Chengdu 611756,

8 China

9 Corresponding author.: Professor Ai-ping Zhang,

10 Phone: +86-13488951126; E-mail: apzhang@sicnu.edu.cn

11

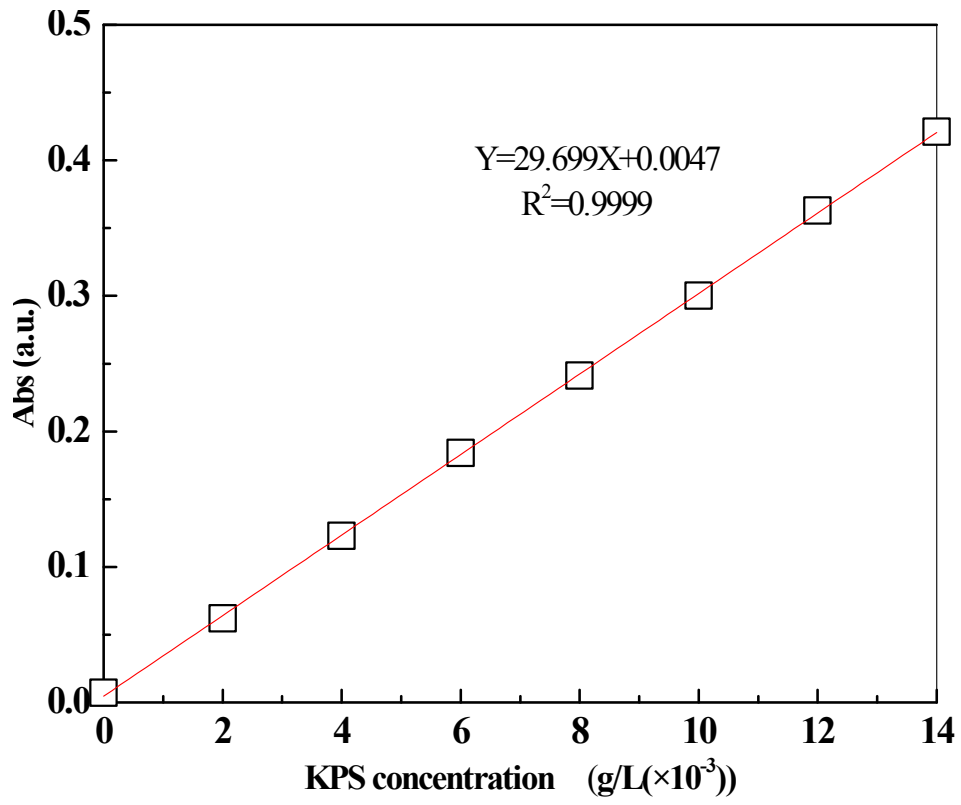

12

13

14

Fig. SM-1 Persulfate concentration standard curve
